# Supplementary material for: Evolution of ribosomal protein network architectures
Source: PubMed Central journal article supplement (PMC7804294; doi:10.1038/s41598-020-80194-4), 2021-01-12
Supplement: 41598_2020_80194_MOESM1_ESM.pdf [file 41598_2020_80194_MOESM1_ESM.pdf]

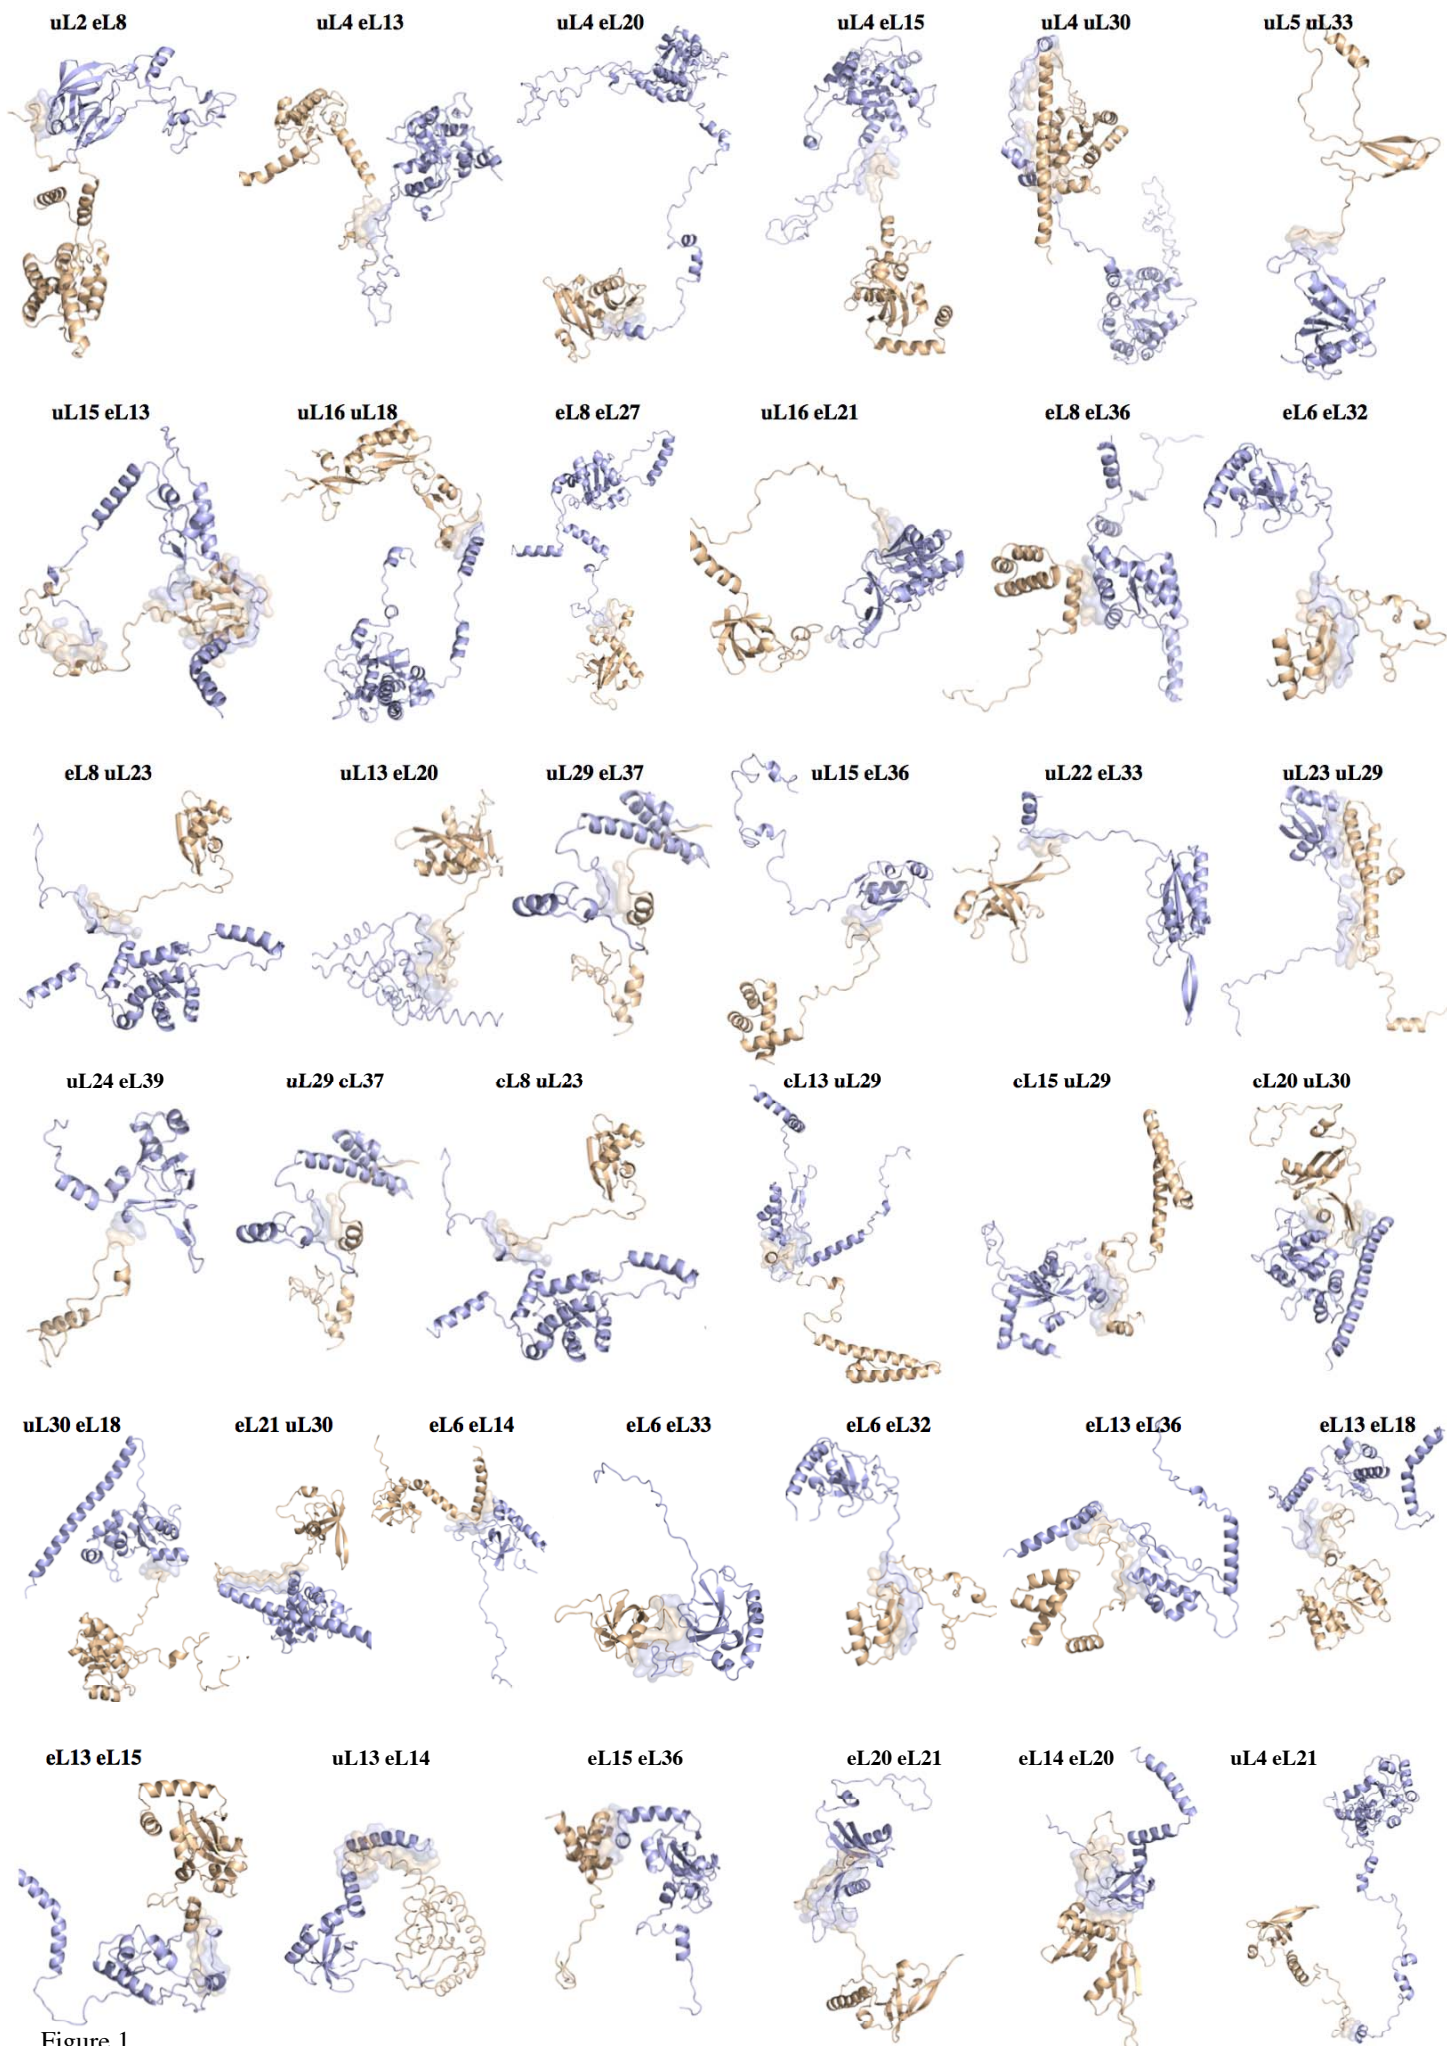

Figure 1

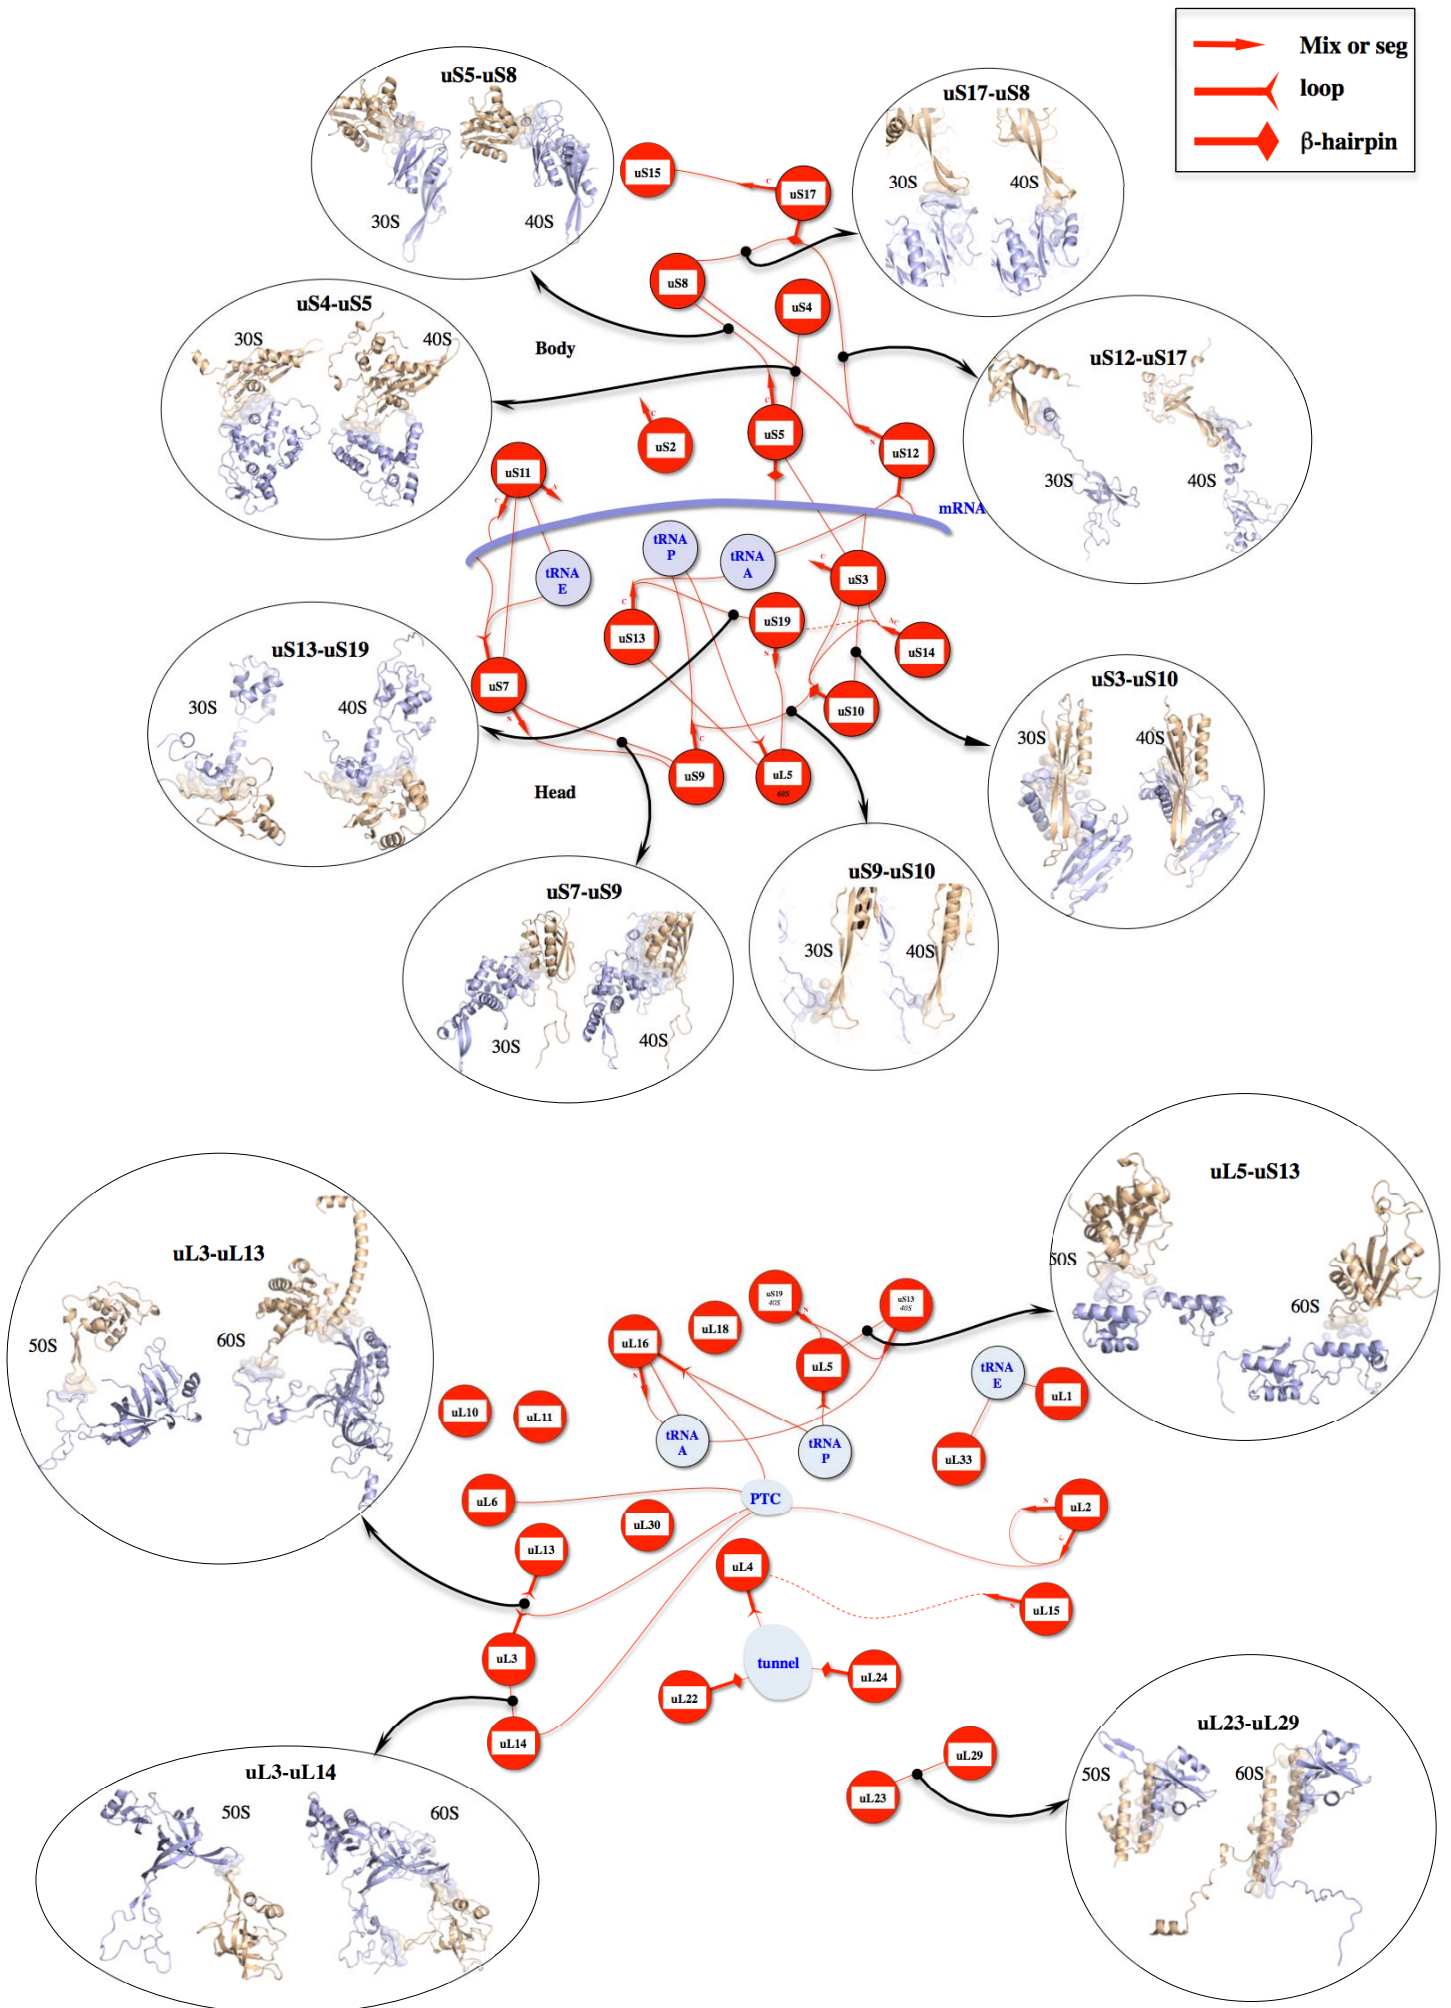

Figure 2

Universal  
r-protein network

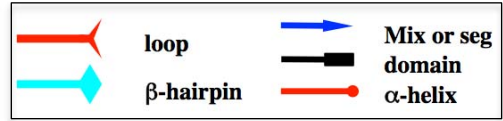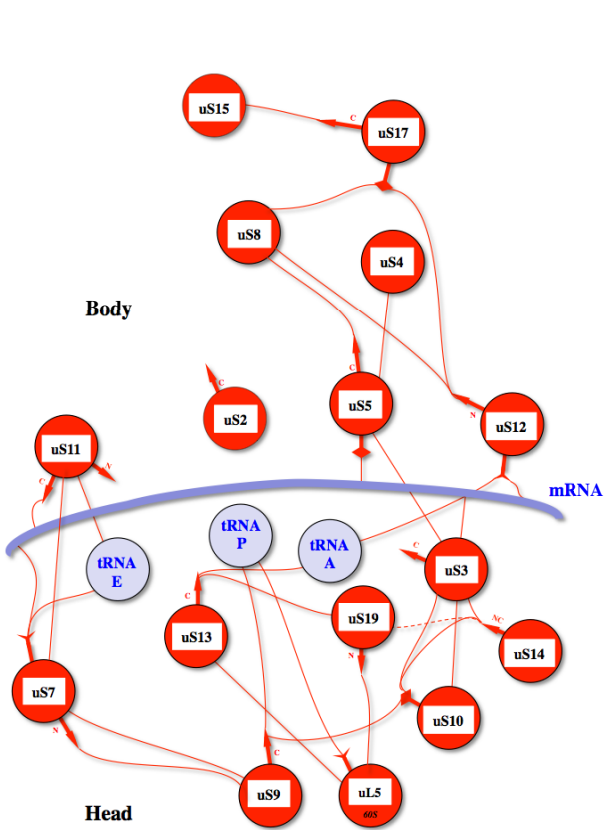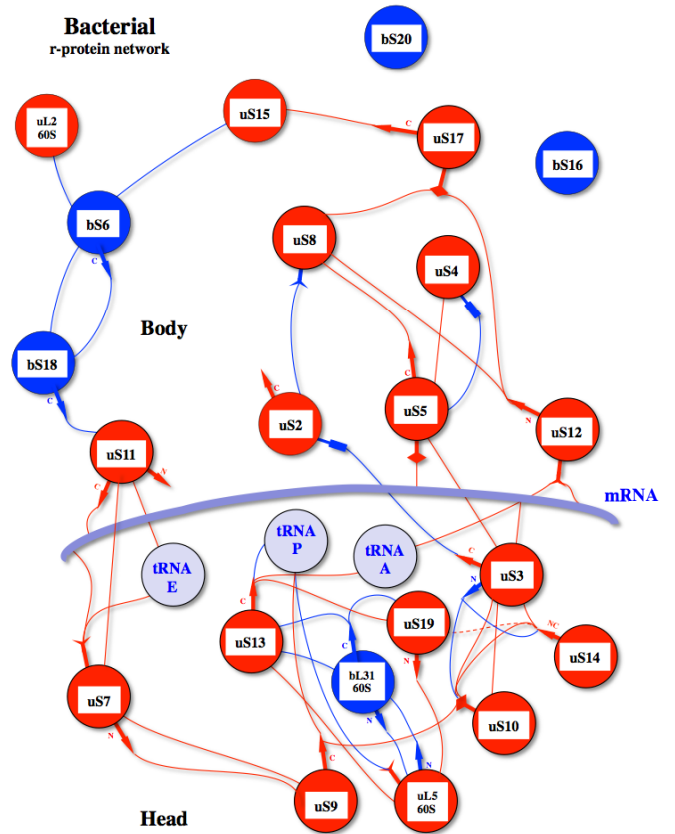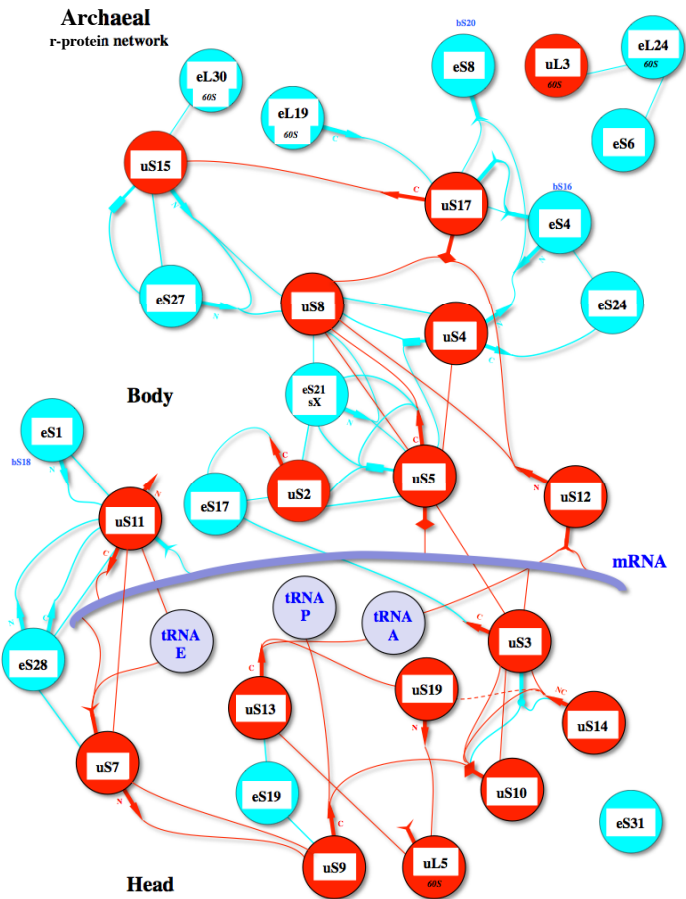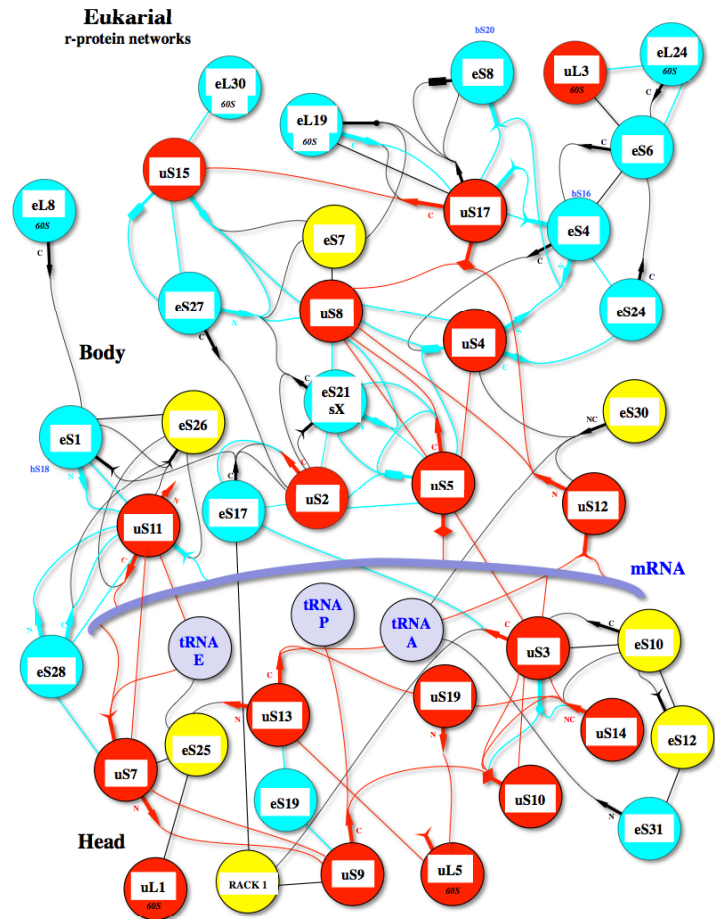

Figure 3



**Archaea**  
r-protein network

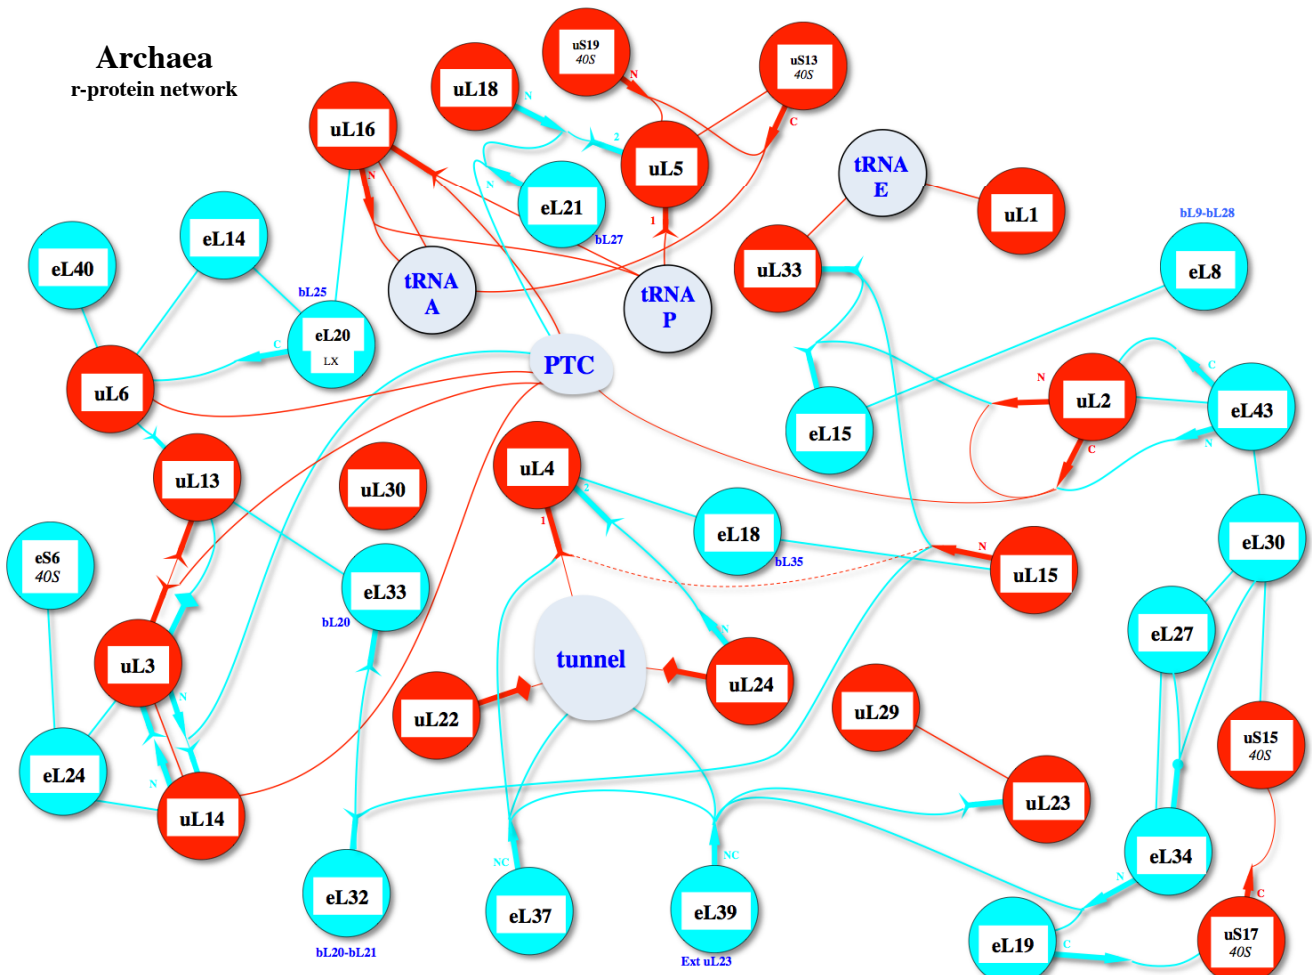

**Eukarya**  
r-protein network

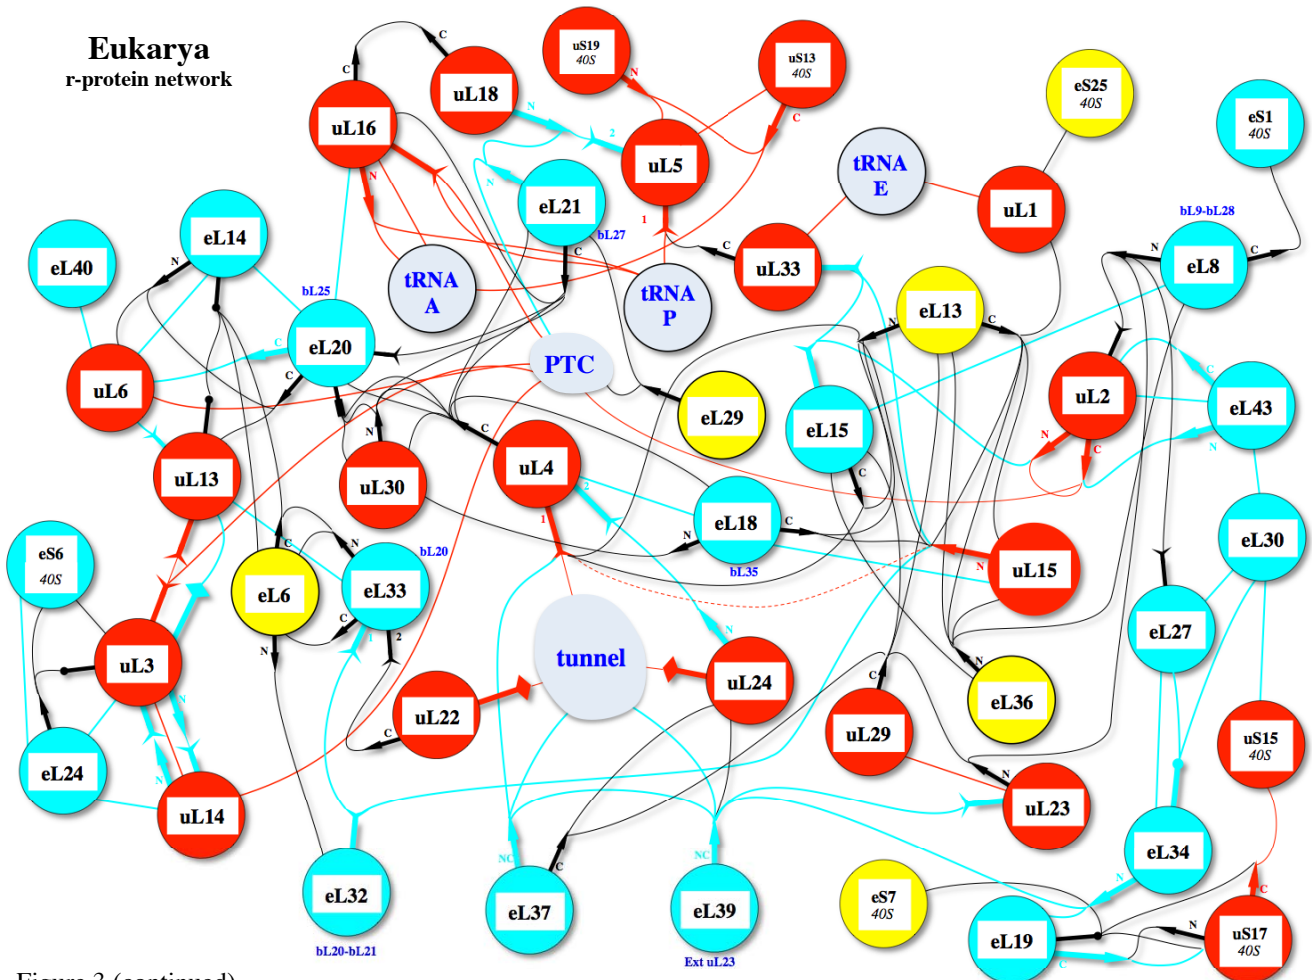

Figure 3 (continued)

### Bacteria

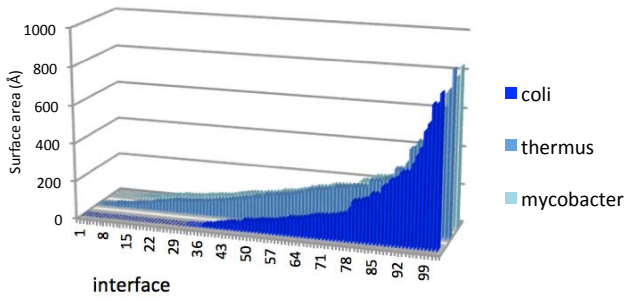

### Eukarya

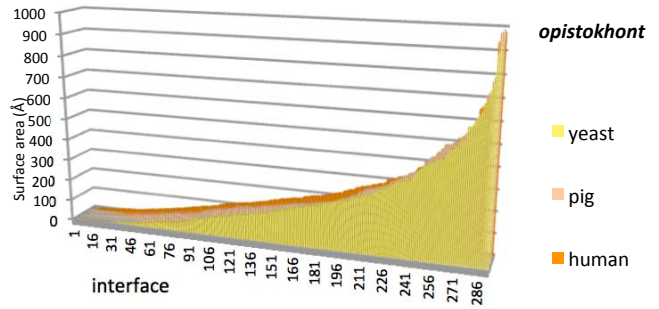

### Archaea

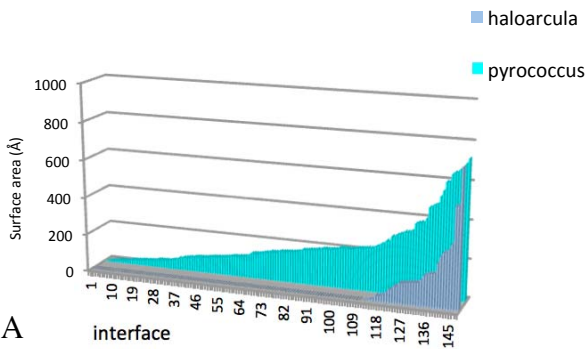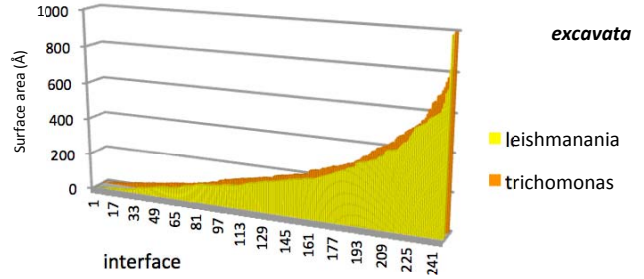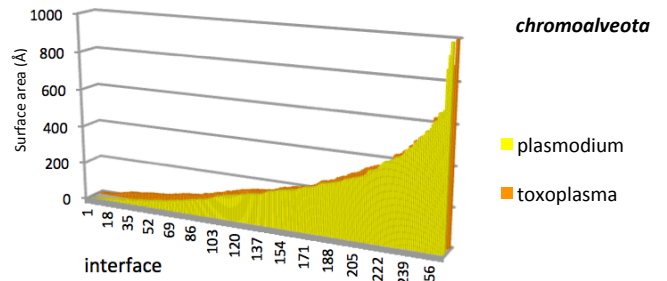

A

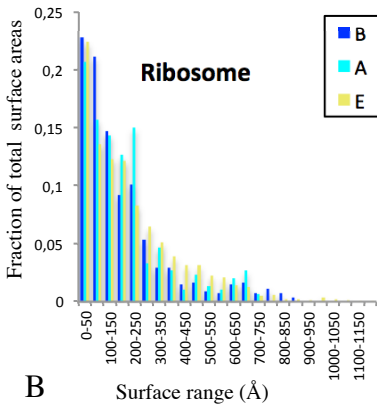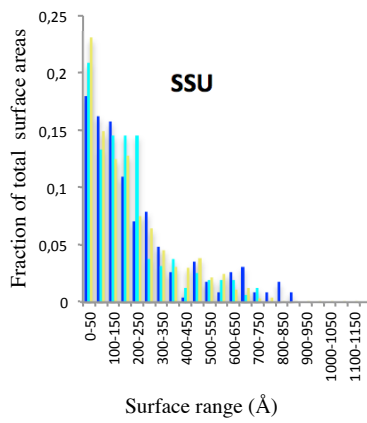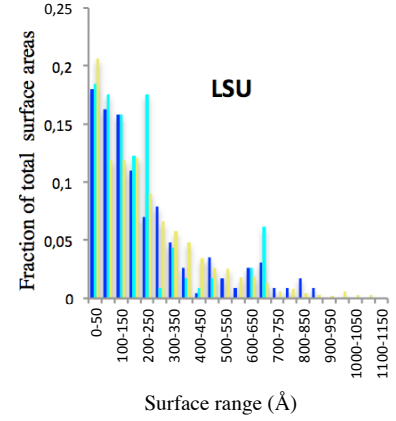

B

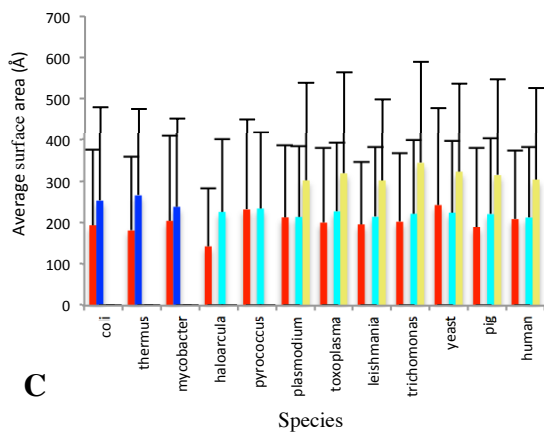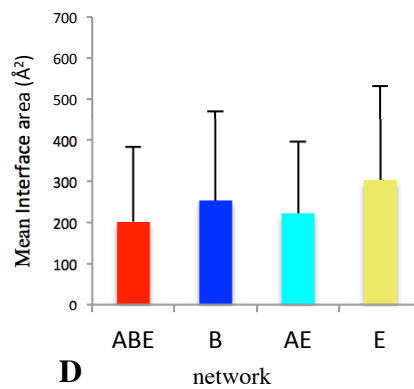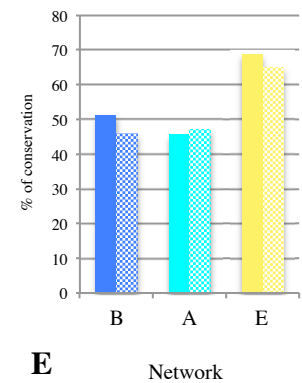

C

D

E

Figure 4
